# Supplementary material
Source: publisher figshare collection journal article supplement (https://diabetesjournals.figshare.com/articles/dataset/_/23519148)
Supplement: Supplementary file 1 [file 1]

**SUPPLEMENT 1: EVIDENCE TABLE FOR GLUCOSE**

| **No** | **1. Updated/new recommendation with its grade and quality of evidence*(2)*** | **2. NACB 2011 recommendation and its grade*(1)*** | **3. Why was it necessary to modify the recommendation?** | **4. Key references supporting the new recommendation** | **5. Study design** | | **6. Level of evidence*(2)*** (high-moderate-low) | **7. Quality of evidence*(2)***  (high-moderate-low-very low) | | **8. Comments** |
| --- | --- | --- | --- | --- | --- | --- | --- | --- | --- | --- |
| **DOES GLUCOSE NEED TO BE MEASURED IN PLASMA FOR THE DIAGNOSIS OF DIABETES MELLITUS?** | | | | | | | | | | |
| a | **Fasting glucose should be measured in venous plasma when used to establish the diagnosis of diabetes, with a value >7.0 mmol/L (> 126 mg/dL) diagnostic of diabetes. *A (high)*** | **When glucose is used to establish the diagnosis of diabetes, it should be measured in venous plasma**  ***A (high)*** | Slightly modified to be more direct and be consistent with other recommendations eg, HbA1c | National Diabetes Data Group. Classification and diagnosis of diabetes mellitus and other categories of glucose intolerance. Diabetes 1979;28:1039–57. | Consensus-based guideline | Moderate | | High | Direct relationship between glucose and complications of diabetes has been shown in earlier high-quality studies incorporated in ADA and WHO guidelines. Difficult to evaluate quality of evidence as plasma glucose has been sole diagnostic criterion for diabetes for many years of clinical practice. Recommendation upgraded to A (high) for direct link between glucose and DM complications and outcomes, and high level of expert consensus and use of glucose-based diagnostic criteria for decades.  WHO recommends „venous plasma glucose” should be standard, but due to wide-spread use of capillary sampling (especially in under-resourced countries) capillary samples are accepted as a pragmatic solution. However, evidence does NOT support use of capillary samples. | |
| WHO. WHO Expert Committee on Diabetes Mellitus: second report. World Health Organ Tech Rep Ser 1980;646:1–80. | Expert consensus/ WHO guidance | Moderate | |
| Report of the Expert Committee on the Diagnosis and Classification of Diabetes Mellitus. Diabetes Care. 1997 Jul: 20(7):1183-97. | Guideline expert opinion | Low | |
| Engelgau MM, et al. [Comparison of fasting and 2-hour glucose and HbA1c levels for diagnosing diabetes. Diagnostic criteria and performance revisited.](http://www.ncbi.nlm.nih.gov/pubmed/9135943) Diab Care 1997;20(5):785-91. | Cross-sectional population-based sample | High | |
| Definition and Diagnosis of Diabetes Mellitus and Intermediate Hyperglycermia, World Health Organization and International Diabetes Federation, 2006 April | Guideline | Low | |
| McCance DR, et al. [Comparison of tests for glycated haemoglobin and fasting and two-hour plasma glucose concentrations as diagnostic methods for diabetes.](http://www.ncbi.nlm.nih.gov/pubmed/8019217) BMJ. 1994; 308(6940): 1323-8. 309(6958):841 | Cross sectional and longitudinal analysis | High | | Provides evidence on the relation between complications and concomitant results of the three tests. | |

| **No** | **1. Updated/new recommendation with its grade and quality of evidence*(2)*** | **2. NACB 2011 recommendation and its grade*(1)*** | **3. Why was it necessary to modify the recommendation?** | **4. Key references supporting the new recommendation** | **5. Study design** | | **6. Level of evidence*(2)*** (high-moderate-low) | **7. Quality of evidence*(2)***  (high-moderate-low-very low) | | **8. Comments** |
| --- | --- | --- | --- | --- | --- | --- | --- | --- | --- | --- |
| **WHEN AND HOW DIABETES MELLITUS SHOULD BE SCREENED IN HIGH RISK INDIVIDUALS?** | | | | | | | | | | |
| b  c | **Screening by HbA1c, FPG or 2-h OGTT is recommended for individuals who are at high risk of diabetes. If HbA1c is <5.7% (<39 mmol/mol), FPG is <5.6 mmol/L (<100 mg/dL), and/or 2-h plasma glucose is <7.8 mmol/L (<140 mg/dL) testing should be repeated at 3-year** **intervals. *B (moderate)***  **Glucose should be measured in venous plasma when used for screening of high-risk individuals.**  ***B (moderate)*** | N/A | N/A | The International Expert Committee. Report on the role of the A1c assay in the diagnosis of diabetes. Diabetes Care 2009 Jul;32 (7):1327–34. | Consensus of international experts | Moderate | | Moderate | Rigorous clinical trials to prove effectiveness of population screening have not been conducted.  Glucose should be measured in venous plasma when used for screening of high-risk individuals.  Overall quality of the body of evidence is moderate and suffers from some degree of indirectness.  There is long-standing and strong consensus of experts and standards of practice with real life data supporting the recommendation | |
| American Diabetes Association. Tests of glycemia in diabetes. Diabetes Care. 2000 Jan;23 Suppl 1:S80-82. | Evidence-based guidance | Moderate | |
| Harris MI. Undiagnosed NIDDM: clinical and public health issues. Diabetes Care. 1993;16(4):642–52 | Comparative study | Moderate | |
| American Diabetes Association Professional Practice Committee. 2. Classification and Diagnosis of Diabetes: Standards of Medical Care in Diabetes—2022. Diabetes Care. 2021;45(Suppl 1):S17–38. | Evidence and consensus based guideline | Moderate | |
| Nathan DM, Bennett PH, Crandall JP, Edelstein SL, Goldberg RB, Kahn SE, et al. Does diabetes prevention translate into reduced long-term vascular complications of diabetes? Diabetologia. 2019;62(8):1319–28. | Expert review | Moderate | |
| American Diabetes Association. Type 2 diabetes in children and adolescents. Diabetes Care. 2000;23(3):381–9. | Guideline | Moderate | |
| Knowler WC, et al. Reduction in the incidence of type 2 diabetes with lifestyle intervention or metformin*.* N Engl J Med 2002; 346:393-403. | RCT | High | |  | |
| Tuomilehto J, et al. Prevention of type 2 diabetes mellitus by changes in lifestyle among subjects with impaired glucose tolerance*.* N Engl J Med 2001; 344:1343-50. | RCT | High | |  | |
| Selph S, Dana T, Blazina I, Bougatsos C, Patel H, Chou. [Screening for type 2 diabetes mellitus: a systematic review for the U.S. Preventive Services Task Force.](https://pubmed.ncbi.nlm.nih.gov/25867111/) R.Ann Intern Med. 2015;162(11):765-76. | Systematic review | High | |  | |
| Icks A, Rathmann W, Haastert B, John J, Löwel H, Holle R, et al. Cost-effectiveness of type 2 diabetes screening: results from recently published studies. Gesundheitswesen. 2005;67 Suppl 1:S167-171. | Evaluates effectiveness of screening guidelines for diagnosing diabetes | High | |  | |
| Perry RC, Shankar RR, Fineberg N, McGill J, Baron AD, Early Diabetes Intervention Program (EDIP). HbA1c measurement improves the detection of type 2 diabetes in high-risk individuals with nondiagnostic levels of fasting plasma glucose: the Early Diabetes Intervention Program (EDIP). Diabetes Care. 2001;24(3):465–71. | Clinical trial | Moderate | |  | |
| Jesudason DR, et al. Macro-vascular risk and diagnostic criteria for type 2 diabetes: implications for the use of FPG and HbA1c for cost-effective screening. Diab Care 2003 Feb; 26 (2):485-90. | Population-based analysis | Moderate - high | |  | |
| Dallo FJ, Weller SC. Effectiveness of diabetes mellitus screening recommendations. Proc Natl Acad Sci USA. 2003;100(18):10574–9. | Cross-sectional study | Moderate- high | | This study evaluates the effectiveness of the guidelines for detecting new cases of DM | |

| **No** | **1. Updated/new recommendation with its grade and quality of evidence*(2)*** | **2. NACB 2011 recommendation and its grade*(1)*** | **3. Why was it necessary to modify the recommendation?** | **4. Key references supporting the new recommendation** | **5. Study design** | **6. Level of evidence*(2)*** (high-moderate-low) | **7. Quality of evidence*(2)***  (high-moderate-low-very low) | **8. Comments** |
| --- | --- | --- | --- | --- | --- | --- | --- | --- |
|  |  |  |  | The cost-effectiveness of screening for type 2 diabetes. CDC Diabetes Cost-Effectiveness 3089 Study Group, Centers for Disease Control and Prevention. JAMA. 1998;280(20):1757–63. | Cost-Effectiveness modelling Study | Moderate |  | Monte Carlo computer simulation model. Uses numerous assumptions. Hypothetical cohort of 10 000 persons. Outcomes are cost per year of life gained and QALY. |
| Hoerger TJ, Harris R, Hicks KA, Donahue K, Sorensen S, Engelgau M. Screening for type 2 diabetes mellitus: a cost-effectiveness analysis. Ann Intern Med 2004;140(9):689–99. | Cost-Effectiveness modelling Study | Moderate | Markov model to simulate effect of screening on diabetes healthcare costs & QALY. |
| Glumer C, Yuyun M, Griffin S, Farewell D, Spiegelhalter D, Kinmonth AL, Wareham NJ. What determines the cost-effectiveness of diabetes screening? Diabetologia 2006;49 (7):1536–44. | Cost-Effectiveness modelling Study | Moderate | Modelling study to evaluate screening for diabetes on CHD risk. |
| Kahn R, Alperin P, Eddy D, Borch-Johnsen K, Buse J, Feigelman J, et al. Age at initiation and frequency of screening to detect type 2 diabetes: a cost-effectiveness analysis. Lancet 2010;375(9723):1365–74. | Cost-Effectiveness modelling Study | Moderate | Archimedes model to compare eight simulated screening strategies for type 2 diabetes with a no-screening control strategy. Outcomes included incidence of myocardial infarction, stroke, microvascular complications and QALY. |
| Zhou X, Siegel KR, Ng BP, Jawanda S, Proia KK, Zhang X, et al. Cost-effectiveness of Diabetes Prevention Interventions Targeting High-risk Individuals and Whole Populations: A Systematic Review. Diab Care. 2020;43(7):1593–616 | Systematic review and cost-effectiveness analysis | Moderate |  |
| Greenberg RA, Sacks DB. Screening for diabetes: is it warranted? Clin Chim Acta 2002;315(1-2):61–9. | Review | Low |  |
| Herman WH, Hoerger TJ, Brandle M, Hicks K, Sorensen S, Zhang P, et al. The cost- effectiveness of lifestyle modification or metformin in preventing type 2 diabetes in adults with impaired glucose tolerance. Ann Intern Med. 2005;142(5):323–32. | Lifetime cost-utility analysis | Moderate - high | Markov simulation model to estimate progression of disease, costs, and quality of life. |
| Genuth S, Alberti KG, Bennett P, Buse J, Defronzo R, Kahn R, et al. Follow-up report on the diagnosis of diabetes mellitus. Diab Care 2003;26(11):3160–7. | Expert report | Moderate |  |
| Forouhi NG, Balkau B, Borch-Johnsen K, Dekker J, Glumer C, Qiao Q, et al. The threshold for diagnosing impaired fasting glucose: a position statement by the European Diabetes Epidemiology Group. Diabetologia 2006;49(5):822–7. | Position statement of experts | Moderate |  |
| Tai ES, Goh SY, Lee JJ, Wong MS, Heng D, Hughes K, et al. Lowering the criterion for impaired fasting glucose: impact on disease prevalence and associated risk of diabetes and ischemic heart disease. Diab Care 2004;27(7): 1728–34. | Cross-sectional observational cohort study studies | Low | Evaluated 3 studies: a cross-sectional sample, a cohort study and a cohort study comprising subjects from 3 cross-sectional studies.  Study not designed to address the recommendation as it focuses on IFG, not FPG |
| Gabir MM, Hanson RL, Dabelea D, Imperatore G, Roumain J, Bennett PH, Knowler WC. The 1997 American Diabetes Association and 1999 World Health Organization criteria for hyperglycemia in the diagnosis and prediction of diabetes. Diab Care 2000;23(8):1108–12. | Comparative observational study | Low | Compared frequency of diabetes by 3 sets of criteria in 5,023 adult Pima Indians. Study not designed to directly address the recommendation |
| Tirosh A, Shai I, Tekes-Manova D, Israeli E, Pereg D, Shochat T, et al. Normal fasting plasma glucose levels and type 2 diabetes in young men. N Engl J Med 2005;353(14):1454–62 | Follow up study | High |
| Emanuelsson F, Marott S, Tybjærg-Hansen A, Nordestgaard BG, Benn M. Impact of Glucose Level on Micro- and Macro-vascular Disease in the General Population: A Mendelian Randomization Study. Diab Care. 2020;43(4):894-902. | Observation and Mendelian Randomi-zation Study | Moderate |  |  |

| **No** | **1. Updated/new recommendation with its grade and quality of evidence*(2)*** | **2. NACB 2011 recommendation and its grade*(1)*** | **3. Why was it necessary to modify the recommendation?** | **4. Key references supporting the new recommendation** | **5. Study design** | **6. Level of evidence*(2)*** (high-moderate-low) | **7. Quality of evidence*(2)***  (high-moderate-low-very low) | **8. Comments** |
| --- | --- | --- | --- | --- | --- | --- | --- | --- |
| d | **Plasma glucose should be measured in an accredited laboratory when used for diagnosis of or screening for diabetes. *GPP*** | **Plasma glucose should be measured in an accredited laboratory when used for diagnosis of or screening for diabetes.**  ***GPP*** | No change | Definition and diagnosis of diabetes mellitus and intermediate hyperglycaemia [Internet]. WHO and International Diabetes Federation; 2006 Apr [cited 2022 May 23]. | Guideline | Low | Very low | Diagnostic testing is done in accredited laboratories in many countries, as standard of practice. There is no direct evidence that measuring glucose in an accredited vs a non-accredited laboratory would grossly impact diagnostic accuracy.  Note: WHO accepts glucometers for screening, for pragmatic reasons i.e., lack of access to an accredited central lab in underdeveloped countries. This represents a strong consensus view that it is “better than doing nothing”.  Evidence is of very low strength and downgraded for indirectness; recommendation reflects good laboratory practice. |
| **DOES PLASMA GLUCOSE NEED TO BE MEASURED FOR THE MONITORING OF DIABETES MELLITUS?** | | | | | | | | |
| e | **Routine measurement of plasma glucose concentrations is not recommended as the primary means of monitoring or evaluating therapy in individuals with diabetes. *B (moderate)*** | **Routine measurement of plasma glucose concentrations in an accredited laboratory is not recommended as the primary means of monitoring or evaluating therapy in individuals with diabetes.**  ***B (low)*** | No change | American Diabetes Association. Tests of glycemia in diabetes. Diabetes Care. 2000;23 Suppl 1:S80-82. | Guideline expert opinion | Low | Moderate | DCCT and UKPDS trials offer indirect evidence for not using glucose as the primary means for monitoring therapy of DM. Due to indirectness of evidence, the strength of the body of evidence is downgraded to moderate even though both trials were otherwise of high quality for other clinical questions. |
| The relationship of glycemic exposure (HbA1c) to the risk of development and progression of retinopathy in the diabetes control and complications trial. Diabetes 1995;44(8):968–83 | RCT | High |
| Stratton IM, Adler AI, Neil HA, Matthews DR, Manley SE, Cull CA, et al. Association of glycaemia with macrovascular and microvascular complications of type 2 diabetes (UKPDS 35): prospective observational study. BMJ 2000;321: 405–12. | Prospective observational study | High |
| The Effect of Intensive Treatment of Diabetes on the Development and Progression of Long-Term Complications in Insulin-Dependent Diabetes Mellitus. N Engl J Med. 1993;329(14):977–86. | RCT | High |
| Nathan DM, Cleary PA, Backlund JY, Genuth SM, Lachin JM, Orchard TJ, et al. Intensive diabetes treatment and cardio-vascular disease in patients with type 1 diabetes. N Engl J Med 2005;353:2643–53. | RCT follow up | High |
| U.K. Prospective Diabetes Study (UKPDS) Group. Intensive blood-glucose control with sulphonylureas or insulin compared with conventional treatment and risk of complications in patients with type 2 diabetes (UKPDS 33). UK Prospective Diabetes Study (UKPDS) Group. Lancet 1998;352:837-53 | RCT | High |
|  |  |  | Selvin E, Marinopoulos S, Berkenblit G, Rami T, Brancati FL, Powe NR, Golden SH. Meta-analysis: glycosylated hemoglobin and cardiovascular disease in diabetes mellitus. Ann Intern Med 2004;141:421–31. | Meta-analysis of observational studies | Moderate |  |
| Ray KK, Seshasai SR, Wijesuriya S, Sivakumaran R, Nethercott S, Preiss D, et al. Effect of intensive control of glucose on cardiovascular outcomes and death in patients with diabetes mellitus: a meta-analysis of randomised controlled trials. Lancet 2009;373:1765–72. | Meta-analysis of randomised controlled trials | High |
| Holman RR, Paul SK, Bethel MA, Matthews DR, Neil HA. 10-year follow-up of intensive glucose control in type 2 diabetes. N Engl J Med 2008; 359:1577–89. | Post-trial follow up of RCT | High |
| Gerstein HC, Miller ME, Byington RP, Goff DC Jr, Bigger JT, Buse JB, et al. Effects of intensive glucose lowering in type 2 diabetes. N Engl J Med 2008;358:2545–59. | RCT | High |

|  |  |  |  | Patel A, MacMahon S, Chalmers J, Neal B, Billot L, Woodward M, et al. Intensive blood glucose control and vascular outcomes in patients with type 2 diabetes. N Engl J Med 2008;358:2560–72. | RCT | High |  |  |
| --- | --- | --- | --- | --- | --- | --- | --- | --- |
| Duckworth W, Abraira C, Moritz T, Reda D, Emanuele N,Reaven PD, et al. Glucose control and vascular complications in veterans with type 2 diabetes. N Engl J Med 2009;360:129– 39. | RCT | High |
| American Diabetes Association Professional Practice Committee. 6. Glycemic Targets: Standards of Medical Care in Diabetes—2022. Diabetes Care. 2021 Dec 16;45(Supplement_1):S83–96. | RCT | High |
| Howe-Davies S, Simpson RW, Turner RC. Control of maturity onset diabetes by monitoring fasting blood glucose and body weight. Diab Care 1980;3:607–10 | Observational | Low |
| Muir A, Howe-Davies SA, Turner RC. General practice care of non-insulin-dependent diabetes with fasting blood glucose measurements. Am J Med 1982;73:637–40. | Observational | Low | Indirect evidence/not germane to recommendation |

| **No** | **1. Updated/new recommendation with its grade and quality of evidence*(2)*** | **2. NACB 2011 recommendation and its grade*(1)*** | **3. Why was it necessary to modify the recommendation?** | **4. Key references supporting the new recommendation** | **5. Study design** | **6. Level of evidence*(2)*** (high-moderate-low) | **7. Quality of evidence*(2)***  (high-moderate-low-very low) | **8. Comments** |
| --- | --- | --- | --- | --- | --- | --- | --- | --- |
| **WHAT ARE THE PRE-ANALYTICAL CONSIDERATIONS IN GLUCOSE TESTING?** | | | | | | | | |
| f | **Blood for fasting plasma glucose analysis should be drawn in the morning after the subject has fasted overnight (at least 8 h).**  ***B (low)*** | **Blood for fasting plasma glucose analysis should be drawn in the morning after the subject has fasted overnight (at least 8 h).**  ***B (low)*** | No change | WHO Definition and Diagnosis of Diabetes Mellitus and Intermediate Hyperglycemia: Report of a WHO/IDF Consultation. Geneva: World Health Organization, 2006 | Guideline | Low | Low | Evidence reveals a diurnal variation in FPG, with mean FPG higher in the morning than in the afternoon, indicating that many cases of diabetes would be missed in patients seen in the afternoon. No RCT compared morning vs afternoon testing in terms of diagnostic accuracy or outcomes. Therefore, quality of evidence is downgraded for indirectness. However, there is strong consensus of experts that a fasting plasma specimen drawn in the morning should be used. |
| Troisi RJ, et al. Diurnal variation in fasting plasma glucose: implications for diagnosis of diabetes in patients examined in the afternoon*.* JAMA 2000; 284:3157-9. | Retrospective population-based study | High |
| Blunt BA, Barrett-Connor E, Wingard DL. Evaluation of fasting plasma glucose as screening test for NIDDM in older adults. Rancho Bernardo Study. Diabetes Care 1991;14:989–93 | Observational | Moderate |
| American Diabetes Association. Report of the Expert Committee on the Diagnosis and Classification of Diabetes Mellitus*.* Diab Care 1997; 20:1183-97. | Guideline | Low |

| **No** | **1. Updated/new recommendation with its grade and quality of evidence*(2)*** | **2. NACB 2011 recommendation and its grade*(1)*** | **3. Why was it necessary to modify the recommendation?** | **4. Key references supporting the new recommendation** | **5. Study design** | **6. Level of evidence*(2)*** (high-moderate-low) | **7. Quality of evidence*(2)***  (high-moderate-low-very low) | **8. Comments** | |
| --- | --- | --- | --- | --- | --- | --- | --- | --- | --- |
| g | **To minimize glycolysis, a tube containing a rapidly effective glycolytic inhibitor such as granulated citrate buffer should be used for collecting the sample.**  **If this cannot be achieved, the sample tube should immediately be placed in an ice-water slurry and subjected to centrifugation to remove the cells within 15-30 minutes.**  **Tubes with only enolase inhibitors such as sodium fluoride should not be relied on to prevent glycolysis.**  ***B (moderate)*** | **To minimize glycolysis, one should place the sample tube immediately in an ice–water slurry, and plasma should be separated from the cells within 30 min. If that cannot be achieved, a tube containing a rapidly effective glycolysis inhibitor, such as citrate buffer, should be used for collecting the sample. Tubes with only enolase inhibitors, such as sodium fluoride, should not be relied on to prevent glycolysis.**  ***B (moderate)*** | New data published supporting granulated citrate buffer as a more potent inhibitor of glycolysis | Bruns DE, Knowler WC. Stabilization of glucose in blood samples: Why it matters. Clin Chem [Editorial] 2009;55:850-2. | Editorial | Low | Moderate | | A consistent body of good evidence that delay in sample processing leads to reduction in glucose in sample, and thus strong consensus that this may alter diagnostic accuracy.  *In vitro* decrease of glucose may lead to missed diagnoses of diabetes in the large proportion of the population who have glucose concentrations near the diagnostic cut points for diabetes.  However, no study is available to determine if this leads to unfavorable outcomes or increased rate of complications. Therefore, quality of evidence is downgraded for indirectness.  Overall, there is high-moderate strength of evidence behind the use of citrated tubes to preserve glucose in vitro. However, it is still unclear if the use of such tubes will do more good than harm and if the currently used diagnostic cut-offs should be maintained or reviewed. There is concern that the citrated tubes will increase glucose values and thus increase the prevalence of GDM/DM which then will have impact on health outcomes, as well as organizational and financial consequences. |
| Chan AY, et al. Effectiveness of sodium fluoride as a preservative of glucose in blood*.* Clin Chem 1989; 35:315-7. | Laboratory study | High |
| Ladenson JH. Nonanalytical sources of variation in clinical chemistry results. In: Sonnenwirth A, Jarett L, eds. Clinical Laboratory Methods and Diagnosis. St. Louis, MO: C.V. Mosby Co., 1980:149 | Review (book chapter) | Low |
| Bruns DE, Metzger BE, Sacks DB. Diagnosis of gestational diabetes mellitus will be flawed until we can measure glucose. Clin Chem. 2020 Feb 1;66(2):265-267. | Editorial | Moderate |
| Rifai N. Tietz Textbook of Clinical Chemistry and Molecular Diagnostics. 6th ed. Elsevier; 2017. | Textbook review | Moderate-Low |
| Sacks DB. Carbohydrates. In: Rifai N, Horvath AR, Wittwer CT, editors. Tietz textbook of clinical chemistry and molecular diagnostics. 6th ed. St. Louis: Elsevier Saunders, 2018. p.518-538. | Textbook review | Moderate-Low |
| Wilson SS, Guillan RA, Hocker EV. [Studies of the stability of 18 chemical constituents of human serum.](https://pubmed.ncbi.nlm.nih.gov/4639860/) Clin Chem. 1972;18(12):1498-503 | Laboratory study | Moderate |
|  |  |  |  | Lin YL, Smith CH, Dietzler DN [Stabilization of blood glucose by cooling with ice: an effective procedure for preservation of samples from adults and newborns.](https://pubmed.ncbi.nlm.nih.gov/1000801/)Clin Chem. 1976;22(12):2031-3. | Prospective observational study | High |  | |  |
| Gambino R et al. Acidification of blood is superior to sodium fluoride alone as an inhibitor of glycolysis. Clin Chem 2009;55:1019-21. | Laboratory study | High |
| [K Uchida](https://pubmed.ncbi.nlm.nih.gov/?sort=date&term=Uchida+K&cauthor_id=2966020), [R Matuse](https://pubmed.ncbi.nlm.nih.gov/?sort=date&term=Matuse+R&cauthor_id=2966020), [E Toyoda](https://pubmed.ncbi.nlm.nih.gov/?sort=date&term=Toyoda+E&cauthor_id=2966020), [S Okuda](https://pubmed.ncbi.nlm.nih.gov/?sort=date&term=Okuda+S&cauthor_id=2966020), [S Tomita](https://pubmed.ncbi.nlm.nih.gov/?sort=date&term=Tomita+S&cauthor_id=2966020). A new method of inhibiting glycolysis in blood samples. Clin Chim Acta 1988;172(1):101-8. | Prospective observational study | Moderate |
| Fobker M. [Stability of glucose in plasma with different anticoagulants.](https://pubmed.ncbi.nlm.nih.gov/24633752/)Clin Chem Lab Med. 2014;52(7):1057-60. | Prospective observational laboratory study | High-moderate |
| Daly N, Flynn I, Carroll C, Stapleton M, O'Kelly R, Turner MJ. Comparison of citrate-fluoride-edta with fluoride-edta additives to stabilize plasma glucose measurements in women being screened during pregnancy with an oral glucose tolerance test: A prospective observational study. Clin Chem 2016;62:886-7. | Prospective observational study | High-moderate |
| van den Berg SA, Thelen MH, Salden LP, van Thiel SW, Boonen KJ. [It takes acid, rather than ice, to freeze glucose.](https://pubmed.ncbi.nlm.nih.gov/25748167/) Sci Rep. 2015;5:8875. | Prospective observational study | High-moderate |
| Carey R, Lunt H, Heenan HF, Frampton CMA, Florkowski CM. Collection tubes containing citrate stabiliser over-estimate plasma glucose, when compared to other samples undergoing immediate plasma separation. Clin Biochem. 2016;49(18):1406–11. | Preanalytical laboratory study | Moderate |
| Fischer MM, Anke Hannemann, Theresa Winter, et al. Relative efficacy of different strategies for inhibition of *in-vitro* glycolysis Clin Chem 2021 Jul 6;67(7):1032-4. | Preanalytical laboratory study | High |
|  |  |  |  | [Peter Ridefelt](https://pubmed.ncbi.nlm.nih.gov/?sort=date&term=Ridefelt+P&cauthor_id=24631175)[1](https://pubmed.ncbi.nlm.nih.gov/24631175/" \l "affiliation-1), [Torbjörn Åkerfeldt](https://pubmed.ncbi.nlm.nih.gov/?sort=date&term=Åkerfeldt+T&cauthor_id=24631175)[2](https://pubmed.ncbi.nlm.nih.gov/24631175/" \l "affiliation-2), [Johanna Helmersson-Karlqvist](https://pubmed.ncbi.nlm.nih.gov/?sort=date&term=Helmersson-Karlqvist+J&cauthor_id=24631175). Increased plasma glucose levels after change of recommendation from NaF to citrate blood collection tubes. Clin Biochem 2014;47(7-8):625-8 | Retrospective analysis of lab data | High |  | |  |
| Ladenson JH, Tsai LM, Michael JM, Kessler G, Joist JH. Serum versus heparinized plasma for eighteen common chemistry tests: is serum the appropriate specimen? Am J Clin Pathol. 1974;62(4):545–52. | Comparative preanalytical study | Moderate |
| Stahl M, et al. Optimization of preanalytical conditions and analysis of plasma glucose. 1. Impact of the new WHO and ADA recommendations on diagnosis of diabetes mellitus*.* Scand J Clin Lab Invest 2001; 61:169-79 | Laboratory study | High |
| Carstensen B, Lindström J, Sundvall J, Borch-Johnsen K, Tuomilehto J, DPS Study Group. Measurement of blood glucose: comparison between different types of specimens. Ann Clin Biochem. 2008;45(Pt 2):140–8. | Comparative preanalytical study | Moderate |
| Miles RR, Roberts RF, Putnam AR, Roberts WL. Comparison of serum and heparinized plasma samples for measurement of chemistry analytes. Clin Chem. 2004;50(9):1704–6. | Comparative preanalytical study | Moderate - high |
| Boyanton BL, Jr., Blick KE. Stability studies of twenty-four analytes in human plasma and serum. Clin Chem 2002; 48:2242-7 | Laboratory study | High |
| Larsson-Cohn U. Differences between capillary and venous blood glucose during oral glucose tolerance tests. Scand J Clin Lab Invest. 1976 Dec;36(8):805–8. | Comparative preanalytical study | Moderate |
| Lind T, de Groot HA, Brown G, Cheyne GA. Observations on blood glucose and insulin determinations. Br Med J. 1972;3(5822):320-3. | Prospective observational study | High |

| **No** | **1. Updated/new recommendation with its grade and quality of evidence*(2)*** | **2. NACB 2011 recommendation and its grade*(1)*** | **3. Why was it necessary to modify the recommendation?** | **4. Key references supporting the new recommendation** | **5. Study design** | | **6. Level of evidence*(2)*** (high-moderate-low) | **7. Quality of evidence*(2)***  (high-moderate-low-very low) | | **8. Comments** |
| --- | --- | --- | --- | --- | --- | --- | --- | --- | --- | --- |
| **WHAT ARE THE ANALYTICAL GOALS FOR GLUCOSE ANALYSIS?** | | | | | | | | | | |
| h | **Based on biological variation, glucose measurement should have analytical imprecision ≤2.4%, bias ≤2.1% and total error ≤6.1%. To avoid misclassification of individuals, the goal for glucose analysis should be to minimize total analytical error and methods should be without measurable bias. *B (moderate)*** | **On the basis of biological variation, glucose measurement should have an analytical imprecision**  **≤2.9%, a bias ≤2.2%, and a total error ≤6.9%. To avoid misclassification of patients, the goal for glucose analysis should be to minimize total analytical error, and methods should be without measurable bias.**  ***B (low)*** | New data reveal improved performance of glucose assays, allowing tighter (narrower) criteria | Sacks DB. Carbohydrates. In: Rifai, Chiu R, Young I, Burnham C, Wittwer C, editors.Tietz Textbook of Laboratory Medicine. 7th ed. St. Louis: Elsevier; 2023. p. 353.e1-353.e23. | Textbook review | Low | | Moderate | There is strong expert consensus and data from modelling studies that the total error of glucose measurement could result in misclassification of patients.  However, quality of evidence is downgraded to moderate for indirectness to outcomes and for lack of primary studies linking analytical performance to health outcomes.  Analytical goals for glucose should ideally be based on outcome studies but in lack of those biological variation data was used for setting analytical performance specifications (i.e Model 2 of the Milan criteria was applied) | |
| Miller WG, Myers GL, Ashwood ER, Killeen AA, Wang E, Ehlers GW, et al. State of the art in trueness and interlaboratory harmonization for 10 analytes in general clinical chemistry. Arch Pathol Lab Med 2008;132:838–46 | Laboratory study | Moderate | |
| Fraser CG, Petersen PH. Analytical performance characteristics should be judged against objective quality specifications. Clin Chem 1999;45: 321–3. | Expert opinion | Moderate | |
| Stockl D, Baadenhuijsen H, Fraser CG, Libeer JC, Petersen PH, Ricos C. Desirable routine analytical goals for quantities assayed in serum. Discussion paper from the members of the External Quality Assessment (EQA) Working Group A on analytical goals in laboratory medicine. Eur J Clin Chem Clin Biochem 1995;33:157–69. | Expert discussion | Low/ moderate | |
| Fraser CG. The necessity of achieving good laboratory performance*.* Diabet Med 1990; 7:490-3. | Expert opinion | Low | |
| Widjaja A, Morris RJ, Levy JC, Frayn KN, Manley SE, Turner RC. Within- and between-subject variation in commonly measured anthropometric and biochemical variables. Clin Chem. 1999;45(4):561–6. | Biological variation study | Low | |
| Mooy JM, Grootenhuis PA, de Vries H, Kostense PJ, Popp-Snijders C, Bouter LM, et al. Intra-individual variation of glucose, specific insulin and proinsulin concentrations measured by two oral glucose tolerance tests in a general Caucasian population: the Hoorn Study. Diabetologia. 1996;39(3):298–305. | Observational | Moderate | |  | |
| Sebastian-Gambaro MA, Liron-Hernandez FJ, Fuentes-Arderiu X. Intra- and inter-individual biological variability data bank. Eur J Clin Chem Clin Biochem 1997;35:845–52. | Review | Low-moderate | |  | |
| Selvin E, Crainiceanu CM, Brancati FL, Coresh J. Short-term variability in measures of glycemia and implications for the classification of diabetes. Arch Intern Med 2007;167:1545–51 | Observational | Moderate | |  | |
| Lacher DA, Hughes JP, Carroll MD. Estimate of biological variation of laboratory analytes based on the Third National Health and Nutrition Examination Survey. Clin Chem 2005;51:450–2 | Analysis of cross-sectional study | Moderate | |  | |
| Aarsand AK, Díaz-Garzón J, Fernandez-Calle P, Guerra E, Locatelli M, et al; European Federation of Clinical Chemistry and Laboratory Medicine Working Group on Biological Variation. The EuBIVAS: Within- and Between-Subject Biological Variation Data for Electrolytes, Lipids, Urea, Uric Acid, Total Protein, Total Bilirubin, Direct Bilirubin, and Glucose. Clin Chem. 2018;64(9):1380-1393. | Prospective observational study | High | | Analytical performance criteria were derived in this high quality study: 91 healthy subjects, fasting samples for 10 consecutive weeks at 6 European labs. Samples analyzed in duplicate on ADVIA. Biological variation data derived from EuBIVAS  Biological variation database accessible on the EFLM website: <https://biologicalvariation.eu/> | |
|  |  |  | González-Lao E, Corte Z, Simón M, Ricós C, Coskun A, Braga F, Aarsand AK, et al. European Federation of Clinical Chemistry and Laboratory Medicine Working Group on Biological Variation and Task Group for the Biological Variation Database. Systematic review of the biological variation data for diabetes related analytes. Clin Chim Acta. 2019;488:61-67 | Meta-analysis of critically assessed studies | High | |  | Identified 23 publications that delivered 46 different estimates of glucose biological variation. Estimates for biological variation from 11 studies deemed suitable for inclusion in the meta-analysis (main reasons for exclusion were unhealthy or elderly individuals) yielded within- and between-person CVs of 4.8% and 7.9%, respectively. Calculated same imprecision, bias and total error as Aarsand et al. | |
